# Supplementary material for: The Ubiquitin Ligase SIAH2 Negatively Regulates Glucocorticoid Receptor Activity and Abundance
Source: MDPI journal article supplement (doi:10.3390/biomedicines9010022), 2020-12-30
Supplement: s1 [file s1]

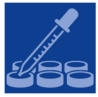

## Supplementary Material

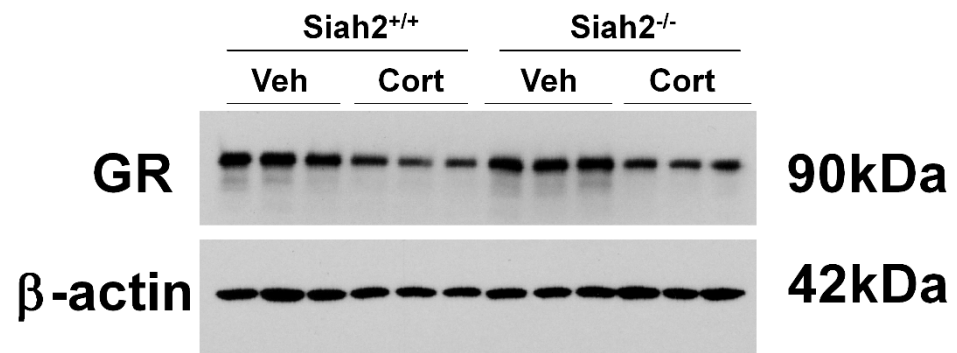

**Scheme 1.** Glucocorticoid receptor abundance is regulated by the presence of corticosterone. GR abundance in eWAT of SIAH2<sup>+/+</sup> and SIAH2<sup>-/-</sup> mice that were administered either vehicle (Veh) or 100 ug/mL Cort via drinking water for three weeks.
